# Supplementary material for: Applying the Consolidated Framework for Implementation Research (CFIR) to understand college health administrator perceptions on adopting and implementing opioid overdose education and naloxone distribution (OEND) programs among universities nationally
Source: Research Square preprint supplement (doi:10.21203/rs.3.rs-7313339/v1), 2025-08-21
Supplement: Supplementary file 1 [file 0463e41752ca8b48d363515a.docx]

*All interview questions and probes mapped onto CFIR 1.0 domains and constructs*

| **Questions and Probes** | **Corresponding CFIR Domains and Constructs** |
| --- | --- |
| 1. What do you see as the most pressing substance use issues on your campus? What are campus norms and attitudes around that among students? | Domain: Inner Setting  Constructs: Relative Priority, Tension for Change, Culture |
| 1. Tell us more about what is in place on your campus related to substance use prevention and education? What resources, services, and programs are currently available at your university to assist students with opioid / substance use? Who is leading efforts on campus and how well-received are they?    1. Tell us about any barriers that you’re aware of for students to access those.    2. How widely are they used? | Domain: Inner Setting  Constructs: Available Resources, Leadership Engagement, Compatibility |
| 1. Describe the factors that you think influence the risk of opioid use among students within your campus and community.    - Probes: Locations (e.g., living situation or social situations, stress, peers, social media, family/personal struggles, academic expectations/pressure, loneliness)?    - Probe: Use of multiple substances?    - Probe: What have you heard about fentanyl in relation to opioids or drug use? | Domain: Inner Setting  Constructs: Tension for Change, Compatibility, Access to Knowledge and Information |
| 1. What are your perceptions of/campus data about use and misuse of opioids? Describe the ways that you think (or know) students may try to protect themselves or each other from the risk of opioid use/misuse. What protective strategies are in place, if any? | Domain: Inner Setting  Constructs: Access to Knowledge and Information, Tension for Change, Compatibility |
| 1. Have you ever attended an opioid education/naloxone training session? | Domain: Characteristics of Individuals  Construct: Knowledge and Beliefs about the Intervention |
| 1. What do you know about opioid overdose reversal drugs? What are campus attitudes towards naloxone or Narcan? What campus resources, if any, are put towards naloxone/Narcan? | Domain: Characteristics of Individuals  Construct: Knowledge and Beliefs about the Intervention  Domain: Inner Setting  Constructs: Culture, Compatibility, Available Resources |
| 1. How would you feel about opioid/naloxone training being provided at your university?    1. How well does it fit with the values and norms of your campus?    2. What are concerns you may have about an education and training program?    3. What are key barriers to having opioid education on your campus?    4. If you have one in place, what has the reception been on campus?    5. What is your perception of whether other universities nationally are providing training? | Domain: Inner Setting  Constructs: Tension for Change, Compatibility  Domain: Characteristics of Individuals  Construct: Knowledge and Beliefs about the Intervention  Domain: Outer Setting  Construct: Peer Pressure  Domain: Intervention Characteristics  Construct: No specific corresponding constructs, but in asking openly about participants’ and their universities’ perceptions of the intervention, participants had the opportunity to highlight specific aspects of the intervention, corresponding primarily to the Complexity and Cost constructs. |
| 1. What do you feel is the general level of receptivity at your university to providing student education around opioids and training to administer opioid reversal drugs like naloxone among students?  - Students in general? - The faculty? - The administration? - Student leadership? - Community members? - Other focus populations? | Domain: Inner Setting  Construct: Compatibility  Domain: Characteristics of Individuals  Construct: Knowledge and Beliefs about the Intervention  Domain: Outer Setting  Construct: No corresponding construct about the perceptions of members of the surrounding community  Domain: Intervention Characteristics  Construct: No specific corresponding constructs, but in openly asking about participants’ and their universities’ perceptions of the intervention, participants had the opportunity to highlight specific aspects of the intervention, corresponding primarily to the Complexity and Cost constructs. |
| 1. Tell me more about any barriers or challenges to providing opioid education and naloxone training on campus.  - Related to student attitudes, norms, beliefs? - Related to administrative/student health support and leadership and programming? Organizational readiness? - Related to faculty attitudes, beliefs, support? - Related to policies on campus? - Related to national norms/policies among universities nationally or locally? - Related to groups on campus (e.g. campus safety and police?) - Related to parent perceptions? - Related to fear of legal/academic repercussions? - Related to limitations on resources (funding, resources, person power, etc.)? | Domain: Inner Setting  Constructs: Leadership Engagement, Available Resources, Compatibility, Culture  Domain: Characteristics of Individuals  Construct: Knowledge and Beliefs about the Intervention  Domain: Outer Setting  Constructs: Peer Pressure, External Policies and Incentives (no corresponding construct about parent perceptions)  Domain: Intervention Characteristics  Construct: Complexity, Cost |
| 1. Tell me more about anything that might make it easier to have widespread uptake on campus of naloxone training and greater knowledge of opioid related risks?  - Related to framing or promoting the initiative? - Related to student incentives? - Related to administrative/student health support and leadership and programming? - Related to faculty attitudes, beliefs, support? - Related to policies on campus? - Related to resources (funding, resources, person power, etc.)? | Domain: Implementation Process  Constructs: Planning, Engaging  Domain: Inner Setting  Constructs: Leadership Engagement, Available Resources, Compatibility  Domain: Characteristics of Individuals  Construct: Knowledge and Beliefs about the Intervention  Domain: Intervention Characteristics  Constructs: Complexity, Cost |
| 1. To what degree is making education and training related to opioid and naloxone available a priority for your campus? Please explain. | Domain: Inner Setting  Construct: Relative Priority |
| 1. What advice would you give to a campus starting a naloxone training/opioid education? | N/A (broad closing question) |
| 1. Thank you so much for your time and sharing your experiences and perspectives with me. What final thoughts would you like to share about opioid use or opioid prevention on college/university campuses or in your community? | N/A (broad closing question) |
