# Supplementary material for: Applying the Consolidated Framework for Implementation Research (CFIR) to understand college health administrator perceptions on adopting and implementing opioid overdose education and naloxone distribution (OEND) programs among universities nationally
Source: Research Square preprint supplement (doi:10.21203/rs.3.rs-7313339/v1), 2025-08-21
Supplement: Supplementary file 2 [file 279a517a4b597afc4dec7331.docx]

For manuscript titled “Applying the Consolidated Framework for Implementation Research (CFIR) to understand college health administrator perceptions on adopting and implementing opioid overdose education and naloxone distribution (OEND) programs among universities nationally”

Consolidated criteria for reporting qualitative studies (COREQ): 32-item checklist

| **No** | **Item** | **Guide questions** | **Page #/Description** |
| --- | --- | --- | --- |
| **Domain 1: Research team and reflexivity** | | | |
| Personal Characteristics | | | |
| 1. | Interviewer/ facilitator | Which author/s conducted the interview or focus group? | Done   - Pages 5 and 20 |
| 2. | Credentials | What were the researcher’s credentials? E.g. PhD, MD | Done   - Page 1   As some additional detail not included in the manuscript:   - Elizabeth Shelton, MPH – At the time of data collection and initial analysis, Ms. Shelton was an MPH candidate. By the latter stages of analysis, she had earned her MPH. - Dr. Matthew Lee, DrPH, MPH – At the time of data collection, Dr. Lee had earned his MPH and was a DrPH candidate, as he had not yet defended his dissertation. At the time of data analysis, he had earned his DrPH. - G Tharp, MPH – At the time of data collection and initial analysis, Mx. Tharp was an MPH candidate. By the latter stages of analysis, they had earned their MPH. |
| 3. | Occupation | What was their occupation at the time of the study? | Partially included in the manuscript   - Pages 1 and 6   Not included in the manuscript:  Savannah P. Alexander, MPH   - Program Coordinator - Department of Sociomedical Sciences, Columbia University Mailman School of Public Health   Elizabeth Shelton, MPH   - As noted above, at the time of data collection and initial analysis, Ms. Shelton was an MPH candidate. By the latter stages of analysis, she had earned her MPH. Below are her current credentials. - Clinical Research Manager, Bone Marrow Transplant/Cell Therapy and Multiple Myeloma/Amyloidosis - Columbia University Irving Medical Center   Matthew Lee, DrPH, MPH   - As noted above, at the time of data collection, Dr. Lee had earned his MPH and was a DrPH candidate. At the time of data analysis, he had earned his DrPH and was a Research Scientist. Below are his current credentials. - Assistant Professor, Division of Health & Behavior - Department of Population Health - NYU Grossman School of Medicine/NYU Langone Health   G Tharp, MPH   - As noted above, at the time of data collection and initial analysis, Mx. Tharp was an MPH candidate. By the latter stages of analysis, they had earned their MPH. Below are their current credentials. - Senior Manager - Vynamic, LLC: Health Industry Management Consulting   Michael McNeil, EdD, CHES, FACHA   - Associate Vice President & Chief of Staff, Columbia Health - Adjunct Assistant Professor, Sociomedical Sciences, Columbia University Mailman School of Public Health - Program Director, Opioid Overdose Prevention Program #787   Melanie Bernitz, MD, MPH   - Interim Executive Vice President, University Life - Senior Vice President, Columbia Health - Associate Clinical Professor of Medicine (in the Center for Family and Community Medicine), Columbia University Vagelos College of Physicians and Surgeons   Kevin Graves, MS, LMFT   - Licensed Marriage and Family Therapist - Kevin Graves Marriage and Family Therapist, Inc.   Lisa R. Metsch, PhD   - Dean, Columbia School of General Studies - Professor of Sociomedical Sciences - Columbia University   Rachel C. Shelton, ScD, MPH   - Professor, Columbia University - Deputy Chair for Faculty Development & Research Strategy - Department of Sociomedical Sciences, Mailman School of Public Health - Co-Director (for Translational and Implementation Science) of the Irving Institute for Clinical and Translational Research, Columbia University Irving Medical Center - Director, Implementation Science Initiative, Columbia’s Irving Institute CTSA - Associate Editor, Annual Review of Public Health |
| 4. | Gender | Was the researcher male or female? | Not included in the manuscript:   1. Savannah P. Alexander, MPH: Female 2. Elizabeth Shelton, MPH: Female 3. Matthew Lee, DrPH, MPH: Assigned male at birth, genderqueer 4. G Tharp, MPH: Non-binary or gender nonconforming 5. Michael McNeil, EdD, CHES, FACHA: Unspecified 6. Melanie Bernitz, MD, MPH: Female 7. Kevin Graves, MS, LMFT: Unspecified, uses they/he pronouns 8. Lisa R. Metsch, PhD: Female 9. Rachel C. Shelton, ScD, MPH: Female |
| 5. | Experience and training | What experience or training did the researcher have? | Not included in manuscript:   1. Savannah P. Alexander, MPH: Ms. Alexander has expertise in qualitative research methods and the field of mental health and substance use. 2. Elizabeth Shelton, MPH: Ms. Shelton has experience and training in qualitative research methods and sociomedical sciences. 3. Matthew Lee, DrPH, MPH: Dr. Lee has completed several courses on and has had applied experience conducting qualitative research throughout undergraduate, masters, and doctoral training and in his positions held thereafter, namely as an Assistant Professor at the NYU Grossman School of Medicine. 4. G Tharp, MPH: Mx. Tharp has experience and training in qualitative research methods and social determinants of health. 5. Michael McNeil, EdD, CHES, FACHA: Dr. McNeil has expertise in education and training, health promotion, evaluation, and college student health. 6. Melanie Bernitz, MD, MPH: Dr. Bernitz has expertise in clinical and community medicine, health promotion, and college student health. 7. Kevin Graves, MS, LMFT: Mr. Graves has experience and training in qualitative research methods, expertise in the field of mental health and substance use, and lived experience as a mental healthcare provider. 8. Lisa R. Metsch, PhD: Dr. Metsch has expertise in intervention development, community intervention trials, and substance use. 9. Rachel C. Shelton, ScD, MPH: Dr. Shelton is a social and behavioral scientist with expertise in implementation science, sustainability, health equity, and community-based participatory research. She has over 16 years of experience conducting mixed-methods research in both community-based and health system settings, with over 140 peer-reviewed publications in journals including Translational Behavioral Medicine, Social Science & Medicine, American Journal of Public Health, Implementation Science, and Annual Reviews of Public Health. |
| Relationship with participants | | | |
| 6. | Relationship established | Was a relationship established prior to study commencement? | Partially addressed in the manuscript   - Page 6     Not included in the manuscript:   - The researcher who led recruitment, Dr. Michael McNeil, knew some, but not all, prospective participants. Their selection was based on the purposive selection criteria described in the main text, not their relationship with Dr. McNeil. |
| 7. | Participant knowledge of the interviewer | What did the participants know about the researcher? e.g. personal  goals, reasons for doing the research | Not included in the manuscript   - We have provided the email invitation text below to explain what information we provided prospective participants during recruitment:   *[Prospective participant name],*    *I hope this message finds you safe and well.*    *On behalf of Columbia University,****I am reaching out to invite your participation in a naloxone education and training research effort currently underway.****This IRB-approved project aims to better understand the barriers and facilitators to opioid education and naloxone training on college and university campuses.*    *In this next phase of our study, we aim to interview a sample of higher education professionals from across the country and representing a variety of institutions.****We are conducting one-on-one informal interviews of about 40 minutes in an effort to increase the understanding of your perceptions and attitudes towards opioid associated resources on campus, and opioid overdose reversal (naloxone) training.***    *As a higher education staff member working in health, student affairs, and other key roles, you are in an ideal position to provide valuable first-hand information about perceptions of opioid use and the need for naloxone education and training.**We are simply trying to capture your thoughts, views, experiences, and perceptions on the advantages and disadvantages of implementing widespread opioid prevention trainings in college settings. Your responses to the questions will be kept confidential. Each interview will be assigned a code to help ensure that personal identifiers are not revealed during the analysis and write up of findings.*    ***If you are willing to participate in the research and be interviewed, please confirm by responding to my email.****Based on interest, a Research Associate on the project team will be in touch to follow up regarding availability and make the arrangements to conduct the interview. Before being interviewed the team will provide a consent form.*    *Should you have any questions about the study, please contact me.*    ***Thank you for your consideration and I hope you will participate in this important data collection and research process.****Your input will be a valuable addition to our research and the findings could lead to greater public understanding of factors that impact and strategies to support the broader dissemination and implementation of opioid training and educational programs among colleges and universities nationally.*    *In health,*  *Michael P McNeil &*  *The Columbia Health Naloxone Project Team*    *PS – here are a few news links regarding our project that may be of interest*  [***CNN | Four students save lives with the help of Columbia University's naloxone training program***](https://health.columbia.edu/news/cnn-four-students-save-lives-help-columbia-universitys-naloxone-training-program)  [***Progress on Opioid Education and Naloxone Training Program***](https://health.columbia.edu/news/progress-opioid-education-and-naloxone-training-program)  [***Columbia Officials Present at White House Discussion on Opioid Overdose and Response in Higher Education***](https://health.columbia.edu/news/columbia-officials-present-white-house-discussion-opioid-overdose-and-response-higher)  [***Columbia University Announces Opioid Education and Naloxone Training Program on Morningside Campus***](https://health.columbia.edu/news/columbia-university-announces-opioid-education-and-naloxone-training-program-morningside) |
| 8. | Interviewer characteristics | What characteristics were reported about the inter viewer/facilitator?  e.g. Bias, assumptions, reasons and interests in the research topic | Not included in the manuscript:   - At the beginning of each interview, the interviewer said the following IRB-approved language which included the overarching purpose of the research in which our entire research team was interested. This introductory language did not include any specific aspects of the interviewer’s personal interest in the research, nor any other personal information about the interviewer.   *Thank you for speaking with me today to share your thoughts, opinions, and experiences. We are interested in learning more about your perceptions and attitudes towards opioid associated resources on campus, and opioid overdose reversal training.*  *As an administrator, you are an expert on what the student community on your college campus needs.*  *This interview will be recorded for transcription purposes. Please know, confidentially is assured. The information that is shared in this interview will only be used for the purposes of this research study according to our IRB. No comments will be attributable to you individually by name in any published papers.* |
| **Domain 2: study design** | | | |
| Theoretical framework | | | |
| 9. | Methodological orientation and theory | What methodological orientation was stated to underpin the study? e.g. grounded theory, discourse analysis, ethnography, phenomenology,  content analysis | Done   - Pages 2, 5-7 |
| Participant selection | | | |
| 10. | Sampling | How were participants selected? e.g. purposive, convenience,  consecutive, snowball | Done   - Pages 5-6 - Table 1 - Figure 1 |
| 11. | Method of approach | How were participants approached? e.g. face-to-face, telephone, mail,  email | Partially included in the manuscript   - Page 6   Not included in the manuscript:   - All invitations and reminders were sent individually to the prospective participants’ respective institutional email addresses. |
| 12. | Sample size | How many participants were in the study? | Done   - Pages 2 and 5 |
| 13. | Non-participation | How many people refused to participate or dropped out? Reasons? | Not included in the manuscript:   - Eleven individuals declined to participate. No reasons were provided or requested. - Two individuals who agreed to participate were lost to follow-up (i.e., did not show at their scheduled interview time). No reasons were provided or requested. |
| Setting | | | |
| 14. | Setting of data collection | Where was the data collected? e.g. home, clinic, workplace | Not included in the manuscript:   - All individual in-depth semi-structured interviews were conducted virtually via Zoom technology, given that the national scale of data collection and COVID-19 pandemic-related lockdowns precluded in-person data collection. All interviewers were in their private homes at the time of data collection, though we cannot confirm the physical location of the participants during their respective interviews. |
| 15. | Presence of non-participants | Was anyone else present besides the participants and researchers? | Not included in the manuscript:   - No, only the research participant and their respective interviewer were present during each interview. |
| 16. | Description of sample | What are the important characteristics of the sample? e.g. demographic  data, date | Done   - Pages 5-6 - Table 1 - Figure 1 |
| Data collection | | | |
| 17. | Interview guide | Were questions, prompts, guides provided by the authors? Was it pilot  tested? | Done   - Additional File 1 - The interview guide was pilot tested within the study team during mock interviews to prepare for active data collection. Some modifications were made to the wording and ordering of items as a result of this pilot testing. |
| 18. | Repeat interviews | Were repeat inter views carried out? If yes, how many? | Not included in the manuscript   - No, repeat interviews were not carried out. |
| 19. | Audio/visual recording | Did the research use audio or visual recording to collect the data? | Done   - Page 6 |
| 20. | Field notes | Were ﬁeld notes made during and/or after the interview or focus group? | Not included in the manuscript   - Field notes were taken during each interview, which the three interviewers used to facilitate discussion around data saturation every few interviews. |
| 21. | Duration | What was the duration of the interviews or focus group? | Done   - Page 6 |
| 22. | Data saturation | Was data saturation discussed? | Not included in the manuscript   - Yes, as stated above, field notes were taken during each interview, which the three interviewers used to facilitate discussion around data saturation every few interviews. |
| 23. | Transcripts returned | Were transcripts returned to participants for comment and/or correction? | Not included in the manuscript   - No, transcripts were not returned to participants for comments or correction. |
| **Domain 3: analysis and findings** | | | |
| Data analysis | | | |
| 24. | Number of data coders | How many data coders coded the data? | Done   - Pages 6 and 20 |
| 25. | Description of the coding tree | Did authors provide a description of the coding tree? | Done   - Pages 5-7 - Figure 2 |
| 26. | Derivation of themes | Were themes identiﬁed in advance or derived from the data? | Done   - Pages 2, 5-7 |
| 27. | Software | What software, if applicable, was used to manage the data? | Done   - Page 6 |
| 28. | Participant checking | Did participants provide feedback on the ﬁndings? | Not included in the manuscript   - No, participants did not provide feedback on the findings, as additional outreach and data collection were infeasible. |
| Reporting | | | |
| 29. | Quotations presented | Were participant quotations presented to illustrate the themes/ﬁndings?  Was each quotation identiﬁed? e.g. participant number | Done   - Pages 7-15 - Table 2 |
| 30. | Data and findings consistent | Was there consistency between the data presented and the ﬁndings? | Done   - Pages 7-15 - Table 2 |
| 31. | Clarity of major themes | Were major themes clearly presented in the ﬁndings? | Done   - Pages 7-15 - Table 2 |
| 32. | Clarity of minor themes | Is there a description of diverse cases or discussion of minor themes? | Done   - Pages 7-15 - Table 2 |
