# Supplementary material for: Applying the Consolidated Framework for Implementation Research (CFIR) to understand college health administrator perceptions on adopting and implementing opioid overdose education and naloxone distribution (OEND) programs among universities nationally
Source: Research Square preprint supplement (doi:10.21203/rs.3.rs-7313339/v1), 2025-08-21
Supplement: Supplementary file 3 [file 794f816cef87485836c21a59.docx]

Most salient emergent codes and operationalized CFIR constructs per conceptual categorya

| **Conceptual category** | **Emergent codes initially mapped onto CFIR 1.0 domains and later mapped onto CFIR 2.0 constructsb** | **Operationalized CFIR 1.0 constructs later mapped onto CFIR 2.0 constructsc** |
| --- | --- | --- |
| 1 – Relationships between Accessibility of the Intervention, Administration, and Planning & Engaging Codes | *ACCESSIBILITY OF THE INTERVENTION (INTERVENTION CHARACTERISTICS DOMAIN)*   - Describes the ability of students and campus personnel to utilize the intervention on campus or obtain training and/or naloxone kits outside of campus. Use when the participant describes the timing/ location/ scheduling/ detailed logistics of the intervention in relation to campus events or accessibility of naloxone kits and/or training in the surrounding community. Do not use when the participant describes campus personnel who already carry naloxone, such as public safety (which would be coded under internal partnerships). - No related but distinct CFIR 1.0 constructs - **MATCHING CFIR 2.0 CONSTRUCT? – NO.** There are no related but distinct CFIR 2.0 constructs either. | *ADMINISTRATION (INNER SETTING DOMAIN)*   - Mentions of campus administrators/ leadership/ overarching policies. Use when the participant describes the role of administrators/leadership or broad policies that relate to implementing the intervention. - Matching CFIR 1.0 construct: Leadership Engagement (Inner Setting domain) - Matching CFIR 2.0 constructs: High- and Mid-Level Leaders (Individuals domain)   *PLANNING & ENGAGING (IMPLEMENTATION PROCESS DOMAIN)*   - Describes the steps needed to be taken to implement intervention on campus, including approval/input from specific offices or external entities needed to implement intervention. - Matching CFIR 1.0 constructs: Combination of Planning and Engaging (Implementation Process domain) - Matching CFIR 2.0 constructs: Combination of Planning and Engaging (Implementation Process domain) |
| 2 – Relationships between Rationale for Intervention, Data Infrastructure, and Relative Priority Codes | *RATIONALE FOR INTERVENTION (INTERVENTION CHARACTERISTICS DOMAIN)*   - Describes the justifications/ evidence/ explanations needed for intervention to be implemented. Use when the participant references the basis of the intervention and reasoning for its implementation (e.g., data) or lack thereof. - Related but distinct CFIR 1.0 construct: Tension for Change (Inner Setting domain) - **MATCHING CFIR 2.0 CONSTRUCT? – NO.** Still the related but distinct construct of Tension for Change (Inner Setting domain).   *DATA INFRASTRUCTURE (INNER SETTING DOMAIN)*   - Describes the source of information used to define opioid/other substance use on campus. Use when the participant describes surveys/data collection processes to gather information about opioid/substance use on campus (could involve imputation from community/region-level data) or lack thereof, including when the participant describes a need to see quantitative evidence of opioid misuse/overdose. - Related but distinct CFIR 1.0 construct: Patient Needs and Resources (Outer Setting domain) - **MATCHING CFIR 2.0 CONSTRUCT? – YES.** Learning-Centeredness (Inner Setting domain); Assessing Needs (Implementation Process domain) | *RELATIVE PRIORITY (INNER SETTING DOMAIN)*   - Ability/willingness to implement the intervention within the context of finite campus resources and/or competing priorities. Use when the participant compares the value of intervention to other programming/priorities or in relation to available resources (funding, staff, etc.). Also use when the participant more generally discusses resources at their office’s disposal without explicitly mentioning the intervention. - Matching CFIR 1.0 construct: Relative Priority (Inner Setting domain) - Matching CFIR 2.0 construct: Relative Priority (Inner Setting domain) |
| 3 – Relationships between Opioid Use on Campus, Substance Use on Campus, and Substance Use Resources Codes | *OPIOID USE ON CAMPUS (INNER SETTING DOMAIN)*   - Describes opioid use on campus; alludes to the correct substances, including when the participant references opioids in relation to campus norms, knowledge and risk. - Related but distinct CFIR 1.0 construct: Patient Needs and Resources (Outer Setting domain) - **MATCHING CFIR 2.0 CONSTRUCT? – YES.** Assessing Needs (Implementation Process domain)   *SUBSTANCE USE ON CAMPUS (INNER SETTING DOMAIN)*   - Describes other substance use (regardless of correct classification) on campus. Use when the participant references substances in relation to campus norms, knowledge and risk. Use when the participant refers to polysubstance use of any kind. - Related but distinct CFIR 1.0 construct: Patient Needs and Resources (Outer Setting domain) - **MATCHING CFIR 2.0 CONSTRUCT? – YES.** Assessing Needs (Implementation Process domain) | *SUBSTANCE USE RESOURCES (INNER SETTING DOMAIN)*   - Descriptions of resources currently available on campus to treat or prevent addiction/support students with substance use issues. Use when the participant describes ways in which campus programming prevents addiction or supports students with substance use issues. - Matching CFIR 1.0 construct: Available Resources (Inner Setting domain) - Matching CFIR 2.0 construct: Available Resources (Inner Setting domain) |
| 4 – Relationships between the External Partnerships and Geographic Region’s Influence Codes | *EXTERNAL PARTNERSHIPS (OUTER SETTING DOMAIN)*   - Current alliances the university/college has with organizations or entities that are operationally separate from the campus. Use when the participant references entities outside campus that may be relevant and/or are needed to implement the intervention. - Related but distinct CFIR 1.0 construct: Cosmopolitanism (Outer Setting domain) - **MATCHING CFIR 2.0 CONSTRUCT? – YES.** Partnerships & Connections (Outer Setting domain)   *GEOGRAPHIC REGION’S INFLUENCE (OUTER SETTING DOMAIN)*   - Describes the ways in which the local community/region affects policies and perceptions of intervention. Use when the community/ region/ state in which the campus resides influences the campus’s decision to support (or not) the intervention, including community/ region/ state opioid misuse levels. - No related but distinct CFIR 1.0 construct. - **MATCHING CFIR 2.0 CONSTRUCT? – YES.** Local Attitudes and Local Conditions (Outer Setting domain) | N/A |
| 5 – Internal Partnerships Code | N/A | *INTERNAL PARTNERSHIPS (INNER SETTING DOMAIN)*   - Current/potential alliances the participant/participant’s office has with organizations or entities within the campus. Use when the participant references other organizations/ departments/ offices within the campus that they partner or could potentially partner with to implement the intervention. - Matching CFIR 1.0 construct: Networks and Communications (Inner Setting domain) - Matching CFIR 2.0 constructs: Relational Connections (Inner Setting domain); Teaming, Assessing Context, Assessing Needs (Implementation Process domain) |

*aConceptual categories are formulated during an intermediate step of qualitative data analysis. As described in the Methods, codes were created and refined using a combined inductive-deductive approach. Based on discussions and consensus building during the coding process, relationships between salient codes emerged. Here, Conceptual Categories 1-4 are each comprised of a group of related codes. Conceptual Category 5 is only comprised of one code due to its rich, multidimensional nature that warranted separate analysis, though it is closely related to the codes grouped within Conceptual Category 1.*

*bWith respect to emergent codes that did not map onto CFIR 1.0 during initial analysis and/or CFIR 2.0 during later analysis, we delineate related but distinct CFIR constructs, respectively.*

*cWith respect to CFIR 1.0 constructs that we operationalized during initial analysis, we delineate the matching CFIR 1.0 constructs as well as the matching CFIR 2.0 constructs identified during later analysis.*
